# Supplementary material for: A global perspective on bacterial diversity in the terrestrial deep subsurface
Source: PubMed Central journal article supplement (PMC9993121; doi:10.1099/mic.0.001172), 2023-01-17
Supplement: mic-169-1172-s001.pdf [file mic-169-1172-s001.pdf]

1 **Supplementary Information – “A global perspective on**  
2 **microbial diversity in the terrestrial deep subsurface”**

3

4 **Authors:**

5 Soares, A.<sup>1,2,3a</sup>, Edwards, A.<sup>2,3\*</sup>, An, D.<sup>4</sup>, Bagnoud, A.<sup>5</sup>, Bradley, J.<sup>6</sup> Barnhart, E.<sup>7,8</sup>, Bomberg, M.<sup>9</sup>,  
6 Budwill, K.<sup>10</sup>, Caffrey, S. M.<sup>11</sup>, Fields, M.<sup>8,12</sup>, Gralnick., J.<sup>13</sup>, Kadnikov, V.<sup>14,15</sup>, Momper, L.<sup>16</sup>,  
7 Osburn, M.<sup>17</sup>, Mu, A.<sup>18,19,20</sup>, Moreau, J.W.<sup>21</sup>, Moser, D.<sup>22</sup>, Purkamo, L.<sup>9,23,24</sup>, Rassner, S. M.<sup>1,3</sup>, Sheik,  
8 C. S.<sup>25</sup>, Sherwood Lollar, B. <sup>26</sup>, Toner, B. M.<sup>27</sup>, Voordouw, G.<sup>4</sup>, Wouters, K.<sup>28</sup>, Mitchell, A. C.<sup>1,3\*</sup>

9

10 **Supplementary Text**

11

12 ***99% closed-reference OTU analysis***

13 A 99% similarity closed-reference OTU-picking strategy to further minimize potential contamination  
14 showed a ~10-fold decrease in the number of OTUs and read numbers (1,065 OTUs and 70,527 reads  
15 were left). Further, this reduced the number of retrieved samples to 93.

16 Following the previously described filtering steps (hold only OTUs represented by more than 500  
17 sequences and present in at least 10 samples), 335 OTUs (67,151 reads) associated to 14 samples  
18 were left. For this reduced dataset, 2 OTUs associated to Chloroplast were found, represented by 115  
19 sequences in total. The very reduced number of samples, OTUs an total reads left in the dataset  
20 caused the 99% OTU approach to be discontinued.

21

## 22 **Supplementary Methodology**

23

### 24 ***Phylogeny of Pseudomonas representative sequences***

25 Representative 16S rRNA gene sequences for *Pseudomonas* OTUs in the dataset were isolated by  
26 retrieving OTU IDs affiliated to this genus in the final dataset using the *subset\_taxa* function within  
27 *phyloseq*[1]. The SILVA 123 database was then queried against the list of OTU IDs and the results  
28 deposited in a FASTA file. Outgroup sequences of genus *Sphingomonas* (Proteobacteria,  
29 Alphaproteobacteria, Sphingomonadales, Sphingomonadaceae) were obtained directly from the  
30 SILVA database (<https://www.arb-silva.de/>) and added along with the retrieved *Pseudomonas* 16S  
31 rRNA gene sequences to a final FASTA file.

32 Using MEGA7[2], an alignment was performed using the MUSCLE[3] algorithm and 8 iterations of  
33 the UPGMB (combines Neighbour-Joining[4] and UPGMA - Unweighted Pair Group Method with  
34 Arithmetic mean) clustering method. An optimal Neighbour-Joining[4] tree (*cf.* **Supplementary**  
35 **Figure 4**) was then created using 500 bootstrapped replicates and the Maximum Composite  
36 Likelihood (MCL)[5] method to calculate evolutionary distances.

37 **Supplementary Figures**  
 38

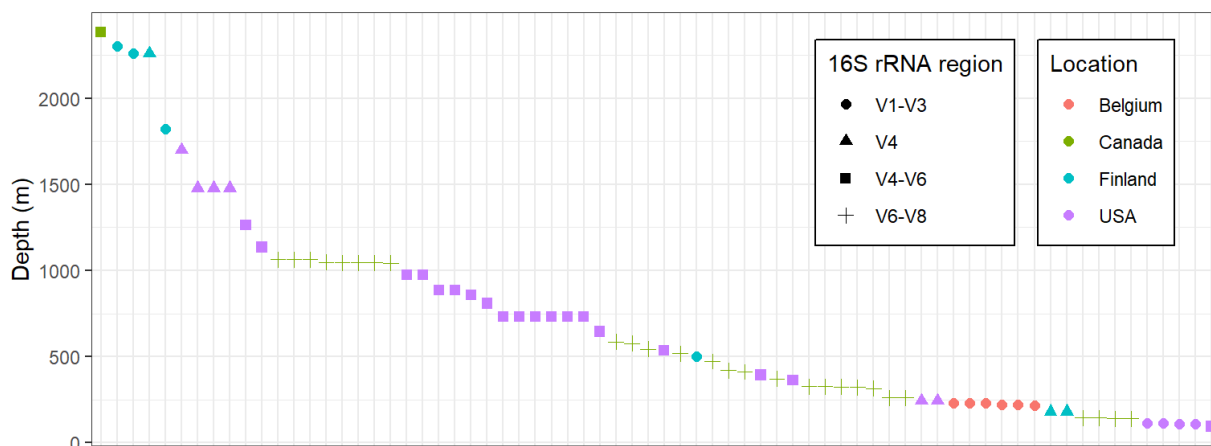

40 **Supplementary Figure 1** – Distribution of samples in the final dataset across depth, coloured by  
 41 general location. Shapes indicate 16S rRNA gene region utilised for that study.

42

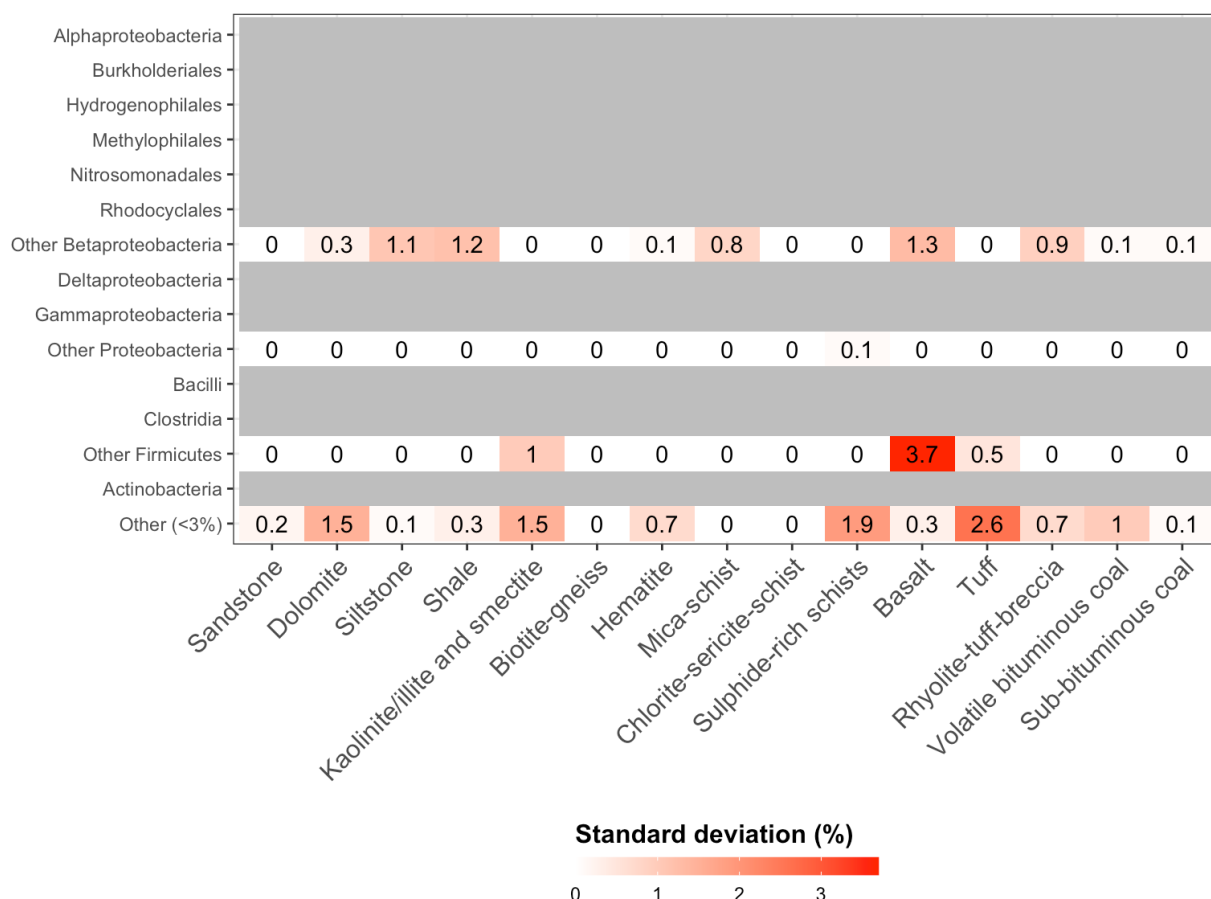

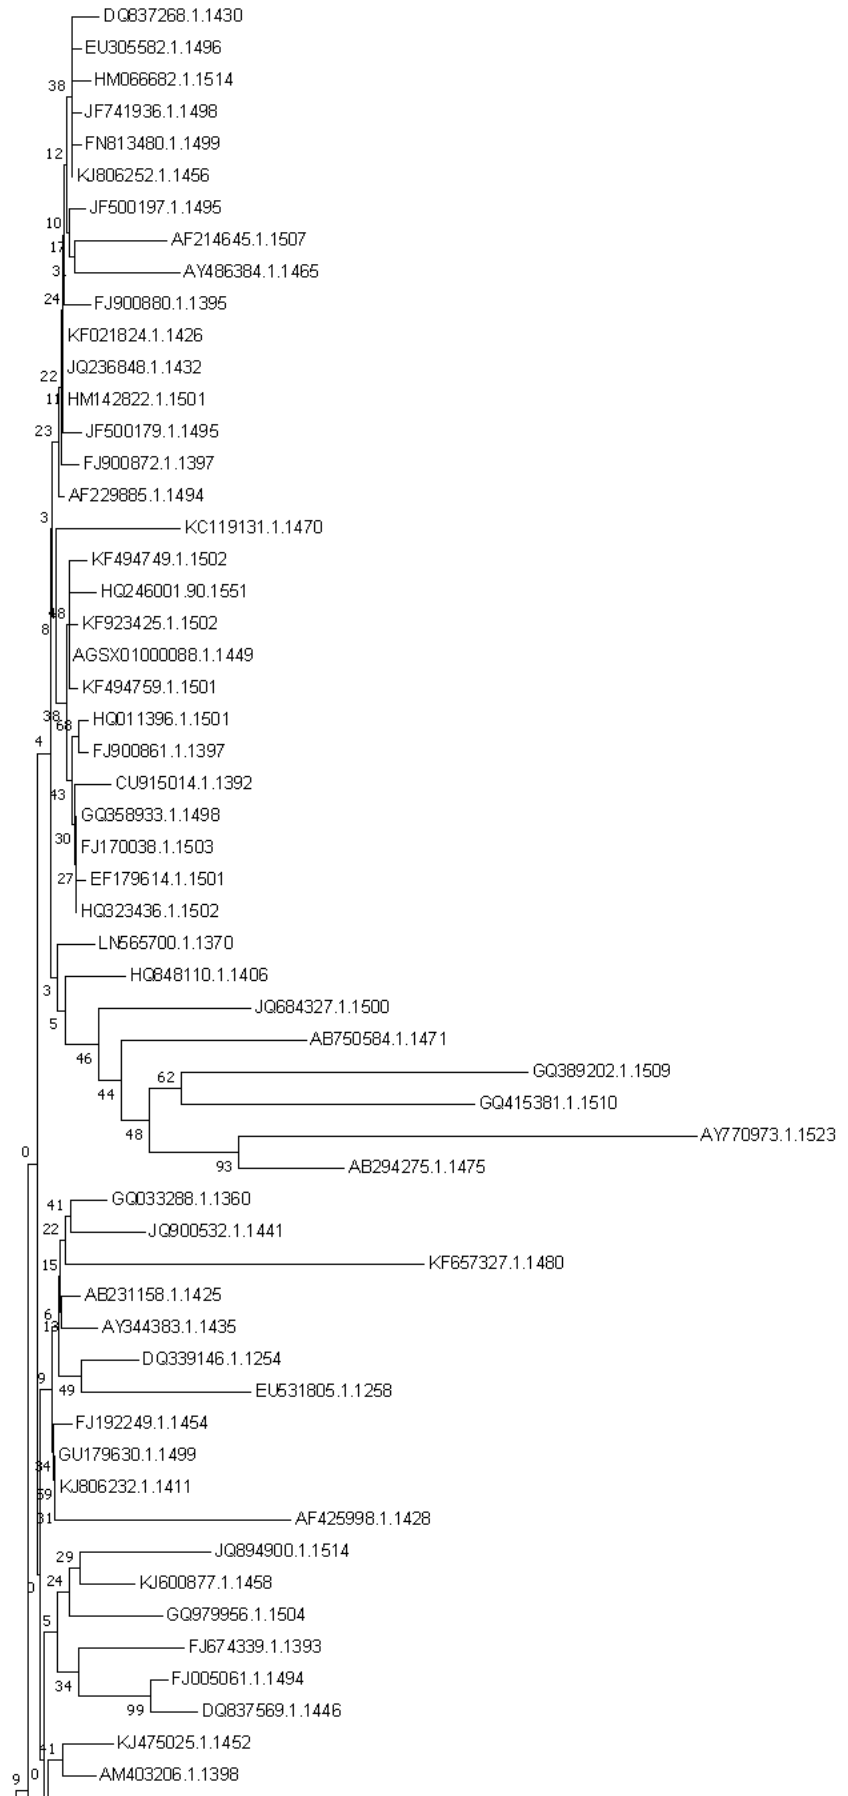

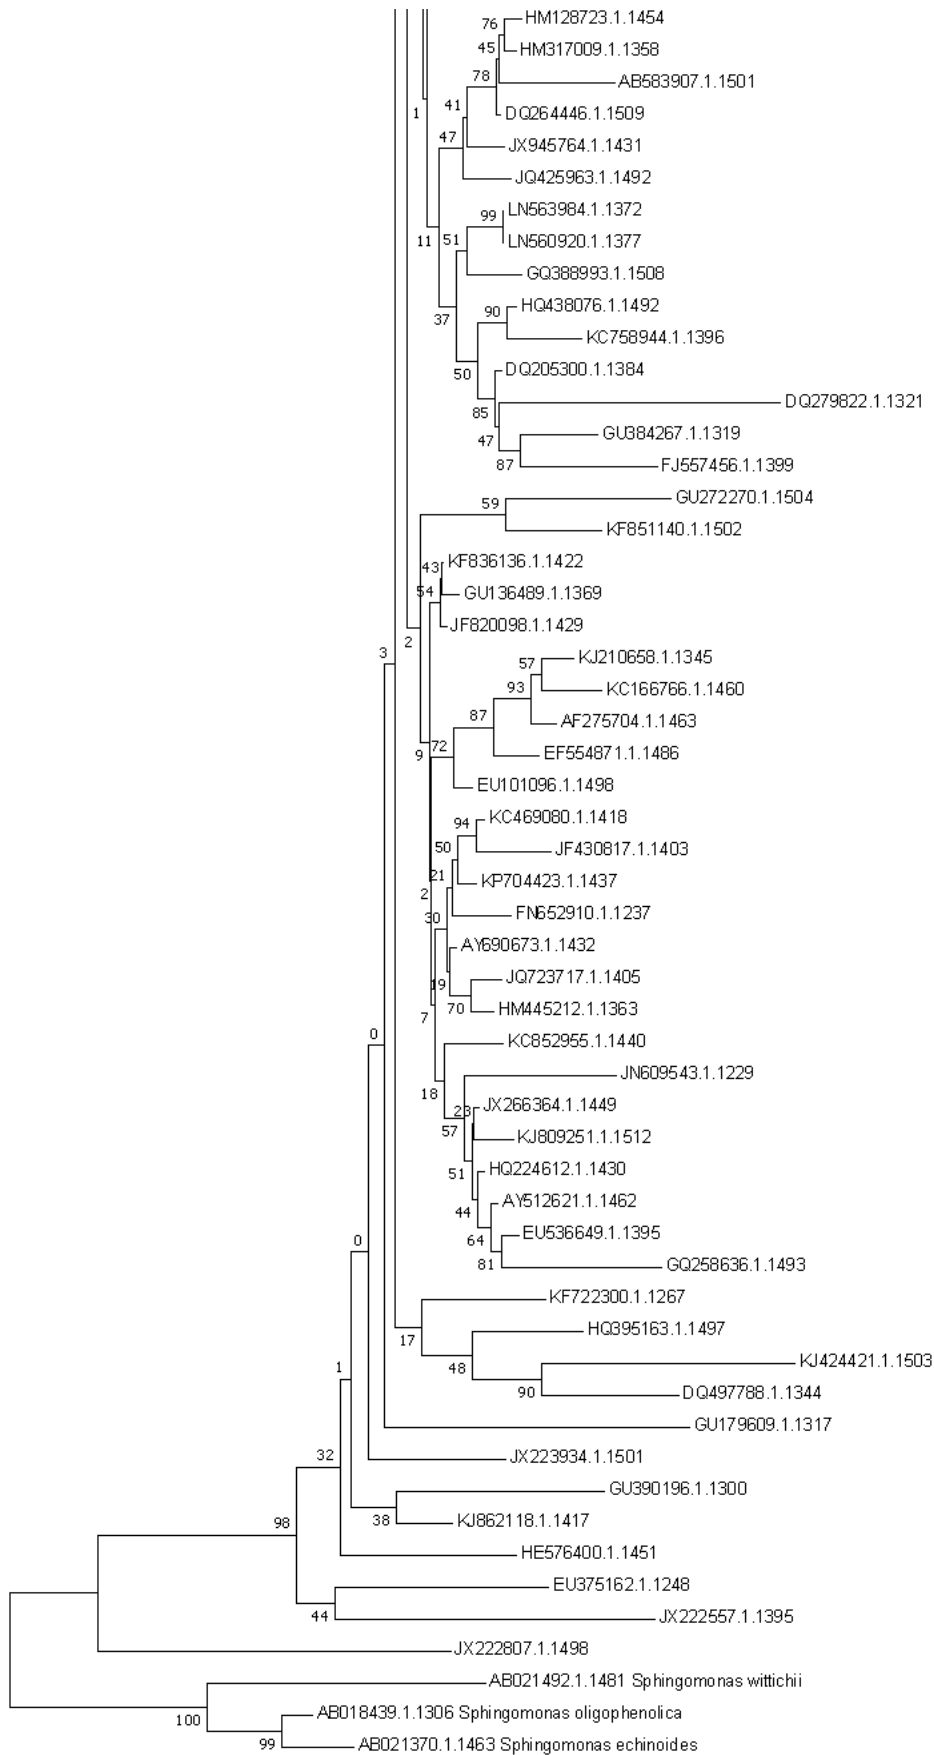

49 **Supplementary Figure 3** – Optimal Neighbor-Joining tree of representative sequences for  
 50 *Pseudomonas* OTUs in the dataset following MUSCLE alignment. OTU IDs are shown in the end of  
 51 each branch and outgroup sequences of genus *Sphingomonas* identified by their taxonomic affiliation.  
 52 The percentage of bootstrap test replicates are shown next to tree branches and scale for MCL  
 53 evolutionary distances is shown in the bottom.  
 54

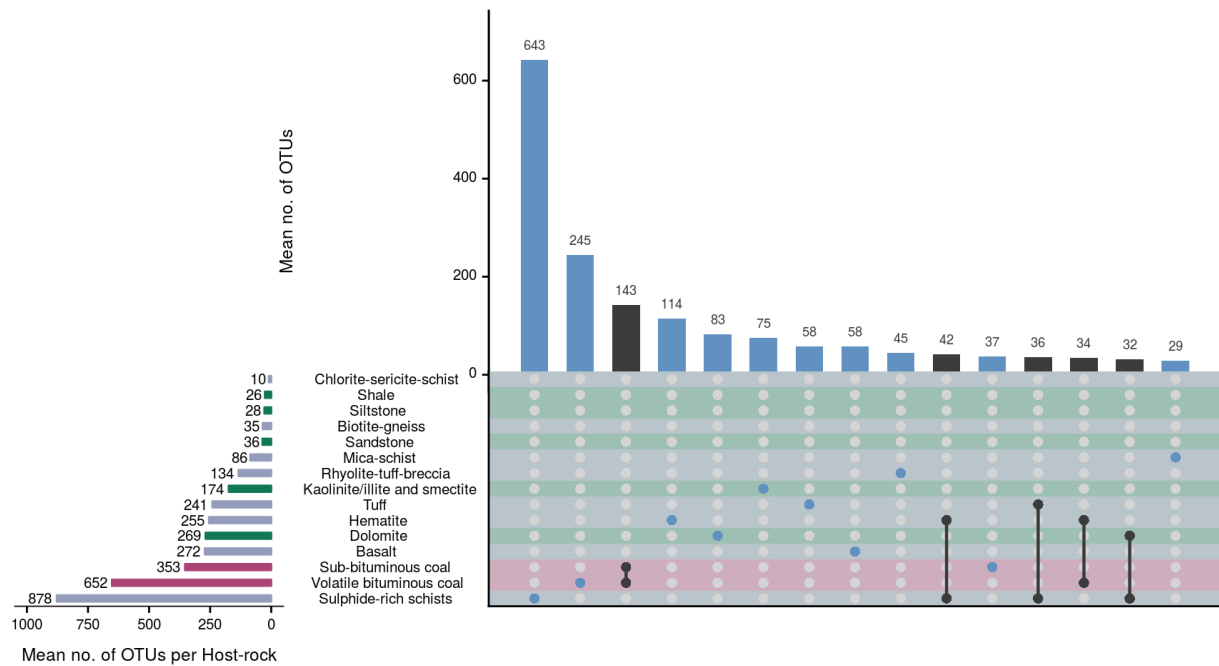

55  
 56 **Supplementary Figure 4** - *UpsetR* plot of mean numbers of OTU interactions among rock types.  
 57 Only interactions involving 25 or more OTUs on average are shown. Coloured matrix rows  
 58 correspond to host-rocks, and are coloured according to rock type: blue for crystalline, green for  
 59 sedimentary rocks and pink for coals, which were highlighted due to their higher sample contribution  
 60 to the dataset. Columns depict OTU interactions: blue dots mark independent (mean number of non-  
 61 shared OTUs) interactions and black dots connected by black lines mark shared OTUs between two  
 62 or more host-rocks. Shared interactions are composed of only the host-rocks marked by dots. Vertical  
 63 bars on top of the coloured matrix correspond to mean OTU numbers present in the described  
 64 interactions and are coloured black or blue if depicting shared or non-shared interactions,  
 65 respectively. Horizontal bars by the left of the coloured matrix depict mean total numbers of OTUs  
 66 per host-rock.

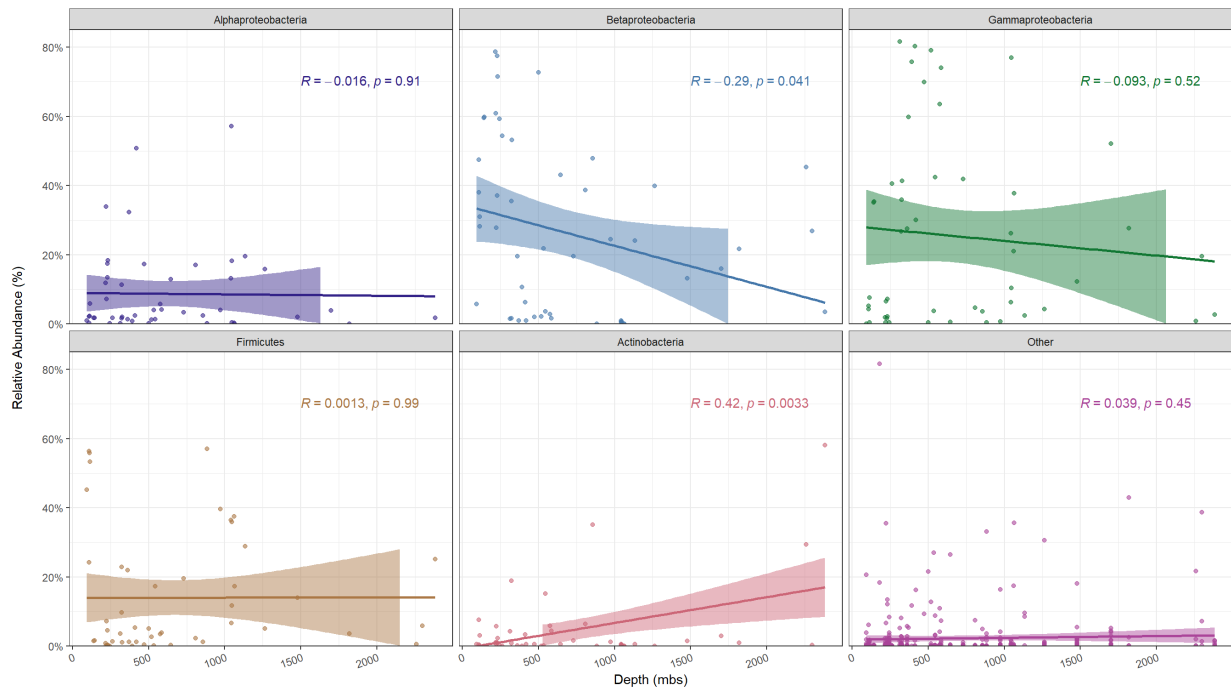

67  
68 **Supplementary Figure 5** - Correlations between relative abundance of OTUs (% , y-axis) associated  
69 to the most abundant taxonomic groups across the dataset and depth (meters below surface, x-axis).  
70 Regression lines follow the linear model and shading around lines corresponds to the 95% confidence  
71 interval. Annotations in plot facets indicate the associated Pearson correlation coefficient, its  
72 corresponding p-value and the fitted linear model equation. Each point represents an OTU associated  
73 to the taxonomic group in each facet at a certain depth - a same OTU may be depicted more than one  
74 time.  
75



76 **Supplementary Tables**

77

78 **Supplementary Table 1** – Numbers of reads following default and the stricter filtering (see  
 79 **Methodology**) employed in this study across class-level taxonomy.

80

| <b>Class</b>                  | <b>Default</b> | <b>Stricter</b> |
|-------------------------------|----------------|-----------------|
| <b>070125-BRIC7-5</b>         | 99             | 98              |
| <b>Acetothermia</b>           | 233            | 233             |
| <b>Acidobacteria</b>          | 2222           | 1942            |
| <b>Actinobacteria</b>         | 16836          | 14734           |
| <b>Aerophobetes</b>           | 3              | 0               |
| <b>Alphaproteobacteria</b>    | 35800          | 26579           |
| <b>Aminicenantes</b>          | 464            | 441             |
| <b>Aquificae</b>              | 3              | 0               |
| <b>ARKDMS-49</b>              | 2              | 0               |
| <b>ARKICE-90</b>              | 21             | 11              |
| <b>Armatimonadetes</b>        | 323            | 0               |
| <b>Atribacteria</b>           | 228            | 143             |
| <b>B1-7BS</b>                 | 10             | 0               |
| <b>Bacilli</b>                | 19147          | 15951           |
| <b>Bacteroidetes</b>          | 11940          | 8833            |
| <b>Burkholderiales</b>        | 70292          | 61648           |
| <b>Caldiserica</b>            | 166            | 161             |
| <b>Candidate division OP3</b> | 2059           | 1998            |
| <b>Candidate division SR1</b> | 228            | 225             |
| <b>Candidate division WS6</b> | 58             | 57              |
| <b>Chlamydiae</b>             | 20             | 0               |
| <b>Chlorobi</b>               | 7667           | 7557            |
| <b>Chloroflexi</b>            | 21365          | 20938           |
| <b>Cloacimonetes</b>          | 132            | 99              |
| <b>Clostridia</b>             | 76415          | 68695           |
| <b>Cyanobacteria</b>          | 3394           | 2546            |
| <b>Deferribacteres</b>        | 33             | 20              |
| <b>Deinococcus-Thermus</b>    | 3679           | 3644            |
| <b>Deltaproteobacteria</b>    | 55381          | 49217           |
| <b>DR-16</b>                  | 3              | 0               |
| <b>Elusimicrobia</b>          | 418            | 384             |
| <b>Epsilonproteobacteria</b>  | 200            | 135             |
| <b>Erysipelotrichia</b>       | 1453           | 1079            |
| <b>Fusobacteria</b>           | 9584           | 9483            |
| <b>Gammaproteobacteria</b>    | 100724         | 84278           |
| <b>Gemmatimonadetes</b>       | 706            | 630             |
| <b>GOUTA4</b>                 | 3              | 0               |
| <b>Gracilibacteria</b>        | 46             | 30              |
| <b>Hot Creek 32</b>           | 1375           | 1232            |
| <b>Hyd24-12</b>               | 13             | 13              |

|                                      |       |       |
|--------------------------------------|-------|-------|
| <b>Hydrogenedentes</b>               | 2276  | 2260  |
| <b>Hydrogenophilales</b>             | 6583  | 4972  |
| <b>JL-ETNP-Z39</b>                   | 87    | 84    |
| <b>JTB23</b>                         | 10    | 0     |
| <b>Kazan-3B-09</b>                   | 22    | 12    |
| <b>Latescibacteria</b>               | 1599  | 1563  |
| <b>Lentisphaerae</b>                 | 83    | 39    |
| <b>Marinimicrobia (SAR406 clade)</b> | 5     | 0     |
| <b>Methylophilales</b>               | 4137  | 3611  |
| <b>Microgenomates</b>                | 164   | 138   |
| <b>Negativicutes</b>                 | 192   | 102   |
| <b>Neisseriales</b>                  | 634   | 560   |
| <b>Nitrosomonadales</b>              | 52361 | 51810 |
| <b>Nitrospirae</b>                   | 15391 | 15133 |
| <b>Omnitrophica</b>                  | 534   | 522   |
| <b>Other (&lt;1%)</b>                | 3     | 0     |
| <b>Other Betaproteobacteria</b>      | 3     | 0     |
| <b>Other Proteobacteria</b>          | 3     | 0     |
| <b>Parcubacteria</b>                 | 173   | 150   |
| <b>PAUC34f</b>                       | 18    | 15    |
| <b>Planctomycetes</b>                | 3456  | 3073  |
| <b>Rhodocyclales</b>                 | 11726 | 9990  |
| <b>Saccharibacteria</b>              | 21    | 0     |
| <b>SC-I-84</b>                       | 16    | 0     |
| <b>SC3-20</b>                        | 2     | 0     |
| <b>SHA-109</b>                       | 1492  | 1479  |
| <b>SM2F11</b>                        | 3     | 0     |
| <b>Spirochaetae</b>                  | 1128  | 846   |
| <b>SPOTSOCT00m83</b>                 | 21    | 15    |
| <b>Synergistetes</b>                 | 63    | 14    |
| <b>TA06</b>                          | 2471  | 2435  |
| <b>TA18</b>                          | 238   | 222   |
| <b>Tenericutes</b>                   | 650   | 279   |
| <b>Thermotogae</b>                   | 64    | 44    |
| <b>TM6</b>                           | 99    | 81    |
| <b>TRA3-20</b>                       | 166   | 147   |
| <b>UCT N117</b>                      | 73    | 59    |
| <b>Verrucomicrobia</b>               | 2052  | 1286  |
| <b>WCHB1-60</b>                      | 15    | 15    |
| <b>WD272</b>                         | 114   | 114   |
| <b>Zetaproteobacteria</b>            | 17    | 0     |

81

82

83 **Supplementary Table 2** – Metadata table with complete details for all studies utilized (CoDL – Census of Deep Life, HMP – Hydrocarbon Metagenomics  
 84 Project).

| 85 | SRA Accession | Depth gradient<br>(m) | DNA Extraction method                        | Sample Type      | 16S region  | Sequencing<br>method | Project |
|----|---------------|-----------------------|----------------------------------------------|------------------|-------------|----------------------|---------|
|    | PRJNA262938   | 243.84-1478.28        | Mod. Phenol chloroform                       | Groundwater      | V4          | 454                  |         |
|    | PRJNA268940   | 94-2383               | MoBio UltraClean Microbial DNA isolation kit | Groundwater      | V4-V6       | 454                  | CoDL    |
|    | PRJNA248749   | 730                   | MoBio PowerWater                             | Groundwater      | V4-V6       | 454                  | CoDL    |
|    | PRJNA251746   | 393-1135              | MoBio PowerMax_Soil                          | Groundwater      | V4-V6       | 454                  | CoDL    |
|    | PRJNA375701   | 109-114.7             | Mod. MP-Biomedicals FastDNA Spin_Soil [6]    | Rock + porewater | V1-V3       | 454                  |         |
|    | NA*           | 140-1064.4            | [7]                                          | Rock + porewater | V6-V8       | 454                  | HMP     |
|    | PRJEB1468     | 217.13-231.83         | XS buffer [8]                                | Groundwater      | V1-V3       | 454                  |         |
|    | PRJEB10822    | 180-2300              | MoBio PowerSoil                              | Groundwater      | V4**, V1-V3 | 454                  |         |

86 \* <http://hmp.ucalgary.ca/HMP/>

87 \* This primer pair corresponds to archaeal 16S rRNA gene primers (A344,A744, cf. 10.5194/bg-13-3091-2016 for further details).

88

89 **Supplementary Table 3 - SILVA 123 taxonomic affiliations of OTUs present in 20 or more samples. Prevalence is defined as the number of samples**  
 90 **an OTU is present in.**

| Taxa ID         | Taxa Classification                                                                   | Prevalence |
|-----------------|---------------------------------------------------------------------------------------|------------|
| JQ236848.1.1432 | Proteobacteria, Gammaproteobacteria, Pseudomonadales, Pseudomonadaceae, Pseudomonas   | 41         |
| HMI42822.1.1501 | Proteobacteria, Gammaproteobacteria, Pseudomonadales, Pseudomonadaceae, Pseudomonas   | 34         |
| JX266364.1.1449 | Proteobacteria, Gammaproteobacteria, Pseudomonadales, Pseudomonadaceae, Pseudomonas   | 31         |
| KJ475025.1.1452 | Proteobacteria, Gammaproteobacteria, Pseudomonadales, Pseudomonadaceae, Pseudomonas   | 27         |
| FJ192249.1.1454 | Proteobacteria, Gammaproteobacteria, Pseudomonadales, Pseudomonadaceae, Pseudomonas   | 26         |
| HQ848110.1.1406 | Proteobacteria, Gammaproteobacteria, Pseudomonadales, Pseudomonadaceae, Pseudomonas   | 25         |
| KC852955.1.1440 | Proteobacteria, Gammaproteobacteria, Pseudomonadales, Pseudomonadaceae, Pseudomonas   | 25         |
| HM773515.1.1498 | Proteobacteria, Betaproteobacteria, Burkholderiales, Comamonadaceae, uncultured       | 24         |
| AB231158.1.1425 | Proteobacteria, Gammaproteobacteria, Pseudomonadales, Pseudomonadaceae, Pseudomonas   | 24         |
| JX222276.1.1475 | Proteobacteria, Betaproteobacteria, Burkholderiales, Comamonadaceae, Variovorax       | 23         |
| EU841498.1.1443 | Proteobacteria; Gammaproteobacteria; Alteromonadales, Alteromonadaceae, Alishewanella | 22         |
| EU305582.1.1496 | Proteobacteria, Gammaproteobacteria, Pseudomonadales, Pseudomonadaceae, Pseudomonas   | 22         |
| FJ900880.1.1395 | Proteobacteria, Gammaproteobacteria, Pseudomonadales, Pseudomonadaceae, Pseudomonas   | 21         |

91

92

93 **Disclaimer: Any use of trade, firm, or product names is for descriptive purposes only and does not imply endorsement by the U.S. Government.**

Supplementary Table 4 – BLAST hits table for representative sequences associated to OTUs affiliated to genus *Pseudomonas*.

| OTU ID             | Closest BLAST hit                                                                      | Associated NCBI Title                                                                                                                                                                                                      | Associated Environment | Taxonomy ID                  | NCBI Accession                    | Percent similarity (%) | E-value | No. Samples Associated | No. Reads Associated |
|--------------------|----------------------------------------------------------------------------------------|----------------------------------------------------------------------------------------------------------------------------------------------------------------------------------------------------------------------------|------------------------|------------------------------|-----------------------------------|------------------------|---------|------------------------|----------------------|
| AB231158.1.1425    | <i>Pseudomonas pseudoalcaligenes</i> gene for 16S rRNA, partial sequence               | High nitrogen removal from wastewater with several new aerobic bacteria isolated from diverse ecosystems                                                                                                                   | Wastewater             | 330                          | gi85539942 dbj AB231158.1         | 100                    | 0       | 24                     | 157                  |
| AB294275.1.1475    | Uncultured bacterium gene for 16S rRNA, partial sequence, clone: YWB06                 | Molecular characterization of microbial communities in deep coal seam groundwater of northern Japan                                                                                                                        | Subsurface             | 77133                        | gi126143387 dbj AB294275.1        | 100                    | 0       | 19                     | 135                  |
| AB583907.1.1501    | Uncultured bacterium gene for 16S rRNA, clone: RBC-4B                                  | Microbial community in water-rock-microbe interaction systems in subsurface environments                                                                                                                                   | Subsurface             | 77133                        | gi324604950 dbj AB583907.1        | 100                    | 0       | 3                      | 137                  |
| AB750584.1.1471    | Uncultured bacterium gene for 16S rRNA, partial sequence, clone: 23 hydrate.Cas.16S    | Novel integrons and gene cassettes from a Cascadian submarine gas hydrate-bearing core                                                                                                                                     | Subsurface             | 77133                        | gi407969505 dbj AB750584.1        | 100                    | 0       | 16                     | 69                   |
| AF214645.1.1507    | Nitrogen-fixing bacterium MIS 16S ribosomal RNA gene, partial sequence                 | Molecular characterization of plant associated nitrogen-fixing Bacteria                                                                                                                                                    | Subsurface             | 120486                       | gi7542430 gb AF214645.1 AF214645  | 100                    | 0       | 4                      | 20                   |
| AF229885.1.1494    | <i>Pseudomonas</i> sp. 3CB6 16S ribosomal RNA gene, partial sequence                   | Isolation and characterization of diverse halobenzozate-degrading denitrifying bacteria from soils and sediments                                                                                                           | Subsurface             | 126132                       | gi9965646 gb AF229885.1           | 100                    | 0       | 9                      | 22                   |
| AF275704.1.1463    | Unidentified Hailaer soda lake bacterium F5 16S ribosomal RNA gene, partial sequence   | China: Inner Mongolia                                                                                                                                                                                                      | Lake                   | 148462                       | gi12275954 gb AF275704.1 AF275704 | 100                    | 0       | 12                     | 47                   |
| AF425998.1.1428    | Bacterium UNSW3 16S ribosomal RNA gene, partial sequence                               | A survey of phylogeny and paralytic shellfish poison production from culturable bacteria associated with a toxic <i>Anabaena circinalis</i> strain                                                                         | Host-associated        | 190587                       | gi23451685 gb AF425998.1          | 100                    | 0       | 14                     | 56                   |
| AGSX0100088.1.1449 | <i>Pseudomonas stutzeri</i> SDM-LAC contig000089, whole genome shotgun sequence        | Genome Sequence of <i>Pseudomonas stutzeri</i> SDM-LAC, a Typical Strain for Studying the Molecular Mechanism of Lactate Utilization                                                                                       | Lab strain             | 271420                       | gi1093258265 embl LT629970.1      | 99.83                  | 0       | 6                      | 28                   |
| AM403206.1.1398    | <i>Pseudomonadaceae</i> bacterium D7-21 partial 16S rRNA gene, isolate D7-21           | Diversity of Nitrate-reducing and Denitrifying Bacteria in a Marine Aquaculture Biofilter                                                                                                                                  | Seawater               | 404904                       | gi115334066 emb AM403206.1        | 100                    | 0       | 8                      | 16                   |
| AY344383.1.1435    | Unidentified bacterium clone K2-4-3 16S ribosomal RNA gene, partial sequence           | Microbial Communities in the Hawaiian Archipelago: A Microbial Diversity Hotspot                                                                                                                                           | Subsurface             | 1869227                      | gi33391921 gb AY344383.1          | 100                    | 0       | 6                      | 10                   |
| AY486384.1.1465    | <i>Pseudomonas stutzeri</i> strain AU4823 16S ribosomal RNA gene, partial sequence     | PCR-based assay for differentiation of <i>Pseudomonas aeruginosa</i> from other <i>Pseudomonas</i> species recovered from cystic fibrosis patients                                                                         | Host-associated        | 316                          | gi40019083 gb AY486384.1          | 100                    | 0       | 7                      | 17                   |
| AY512621.1.1462    | <i>Pseudomonas veronii</i> strain A1YdBTEX2-5 16S ribosomal RNA gene, partial sequence | Alternative primer sets for PCR detection of genotypes involved in bacterial aerobic BTEX degradation: distribution of the genes in BTEX degrading isolates and in subsurface soils of a BTEX contaminated industrial site | Subsurface             | 76761                        | gi41056888 gb AY512621.1          | 100                    | 0       | 15                     | 91                   |
| AY690673.1.1432    | Sulfobacter sp. GC07 16S ribosomal RNA gene, partial sequence                          | The diversity of halotolerant heterotrophic bacteria isolated from rhizosphere soil of salt marshes from southwestern coasts in Korea                                                                                      | Subsurface             | 290364                       | gi51243779 gb AY690673.1          | 100                    | 0       | 1                      | 33                   |
| AY770973.1.1523    | Uncultured bacterium clone W33 16S ribosomal RNA gene, partial sequence                | Molecular analysis of the microbial communities of the oilfield                                                                                                                                                            | Subsurface             | 77133                        | gi54695050 gb AY770973.1          | 100                    | 0       | 10                     | 14                   |
| CU915014.1.1392    | <i>Pseudomonas stutzeri</i> partial 16S rRNA gene, strain 24a97                        | marine sediment and soils                                                                                                                                                                                                  | Subsurface             | 77133                        | gi239913533 emb CU915014.1        | 100                    | 0       | 2                      | 13                   |
| DQ205300.1.1384    | <i>Pseudomonas</i> sp. HI-G1 16S ribosomal RNA gene, partial sequence                  | Culturable microbial diversity and the impact of tourism in Kartchner Caverns, Arizona                                                                                                                                     | Subsurface             | 347772                       | gi76365589 gb DQ205300.1          | 100                    | 0       | 2                      | 15                   |
| DQ264446.1.1509    | Uncultured bacterium clone BANW452 16S ribosomal RNA gene, partial sequence            | High-density universal 16S rRNA microarray analysis reveals broader diversity than typical clone library when sampling the environment                                                                                     | Subsurface             | 77133                        | gi82393910 gb DQ264446.1          | 100                    | 0       | 5                      | 13                   |
| DQ279822.1.1321    | <i>Pseudomonas</i> sp. D14 16S ribosomal RNA gene, partial sequence                    | Direct Submission, strain D14                                                                                                                                                                                              | Lab strain             | 358759                       | gi82697883 gb DQ279822.1          | 100                    | 0       | 6                      | 10                   |
| DQ339146.1.1254    | <i>Pseudomonas</i> sp. M9J18 16S ribosomal RNA gene, partial sequence                  | Isolation of glyphosate-resistant bacterial species M9J18 from glyphosate-polluted wheat soil in China                                                                                                                     | Subsurface             | 366287                       | gi85001608 gb DQ339146.1          | 100                    | 0       | 9                      | 13                   |
| DQ497788.1.1344    | <i>Pseudomonas</i> sp. SGB396 16S ribosomal RNA gene, partial sequence                 | Soil, subsurface, bacterial endophytes from <i>Taxus globosa</i>                                                                                                                                                           | Subsurface             | 77133                        | gi98975506 gb DQ497788.1          | 100                    | 0       | 10                     | 44                   |
| DQ837268.1.1430    | <i>Pseudomonas stutzeri</i> strain WWvi23 16S ribosomal RNA gene, partial sequence     | wastewater in lagos and ogun states Nigeria                                                                                                                                                                                | Wastewater             | 86473                        | gi112434217 gb DQ837268.1         | 100                    | 0       | 7                      | 16                   |
| DQ837569.1.1446    | <i>Pseudomonas</i> sp. K4 16S ribosomal RNA gene, partial sequence                     | Direct Submission, isolate K4                                                                                                                                                                                              | Lab strain             | 394945                       | gi110704228 gb DQ837569.1         | 100                    | 0       | 9                      | 18                   |
| EF179614.1.1501    | <i>Pseudomonas</i> sp. WP02-4-9 16S ribosomal RNA gene, partial sequence               | Isolation from deep-sea sediments                                                                                                                                                                                          | Subsurface             | 444156                       | gi148251203 gb EF179614.1         | 100                    | 0       | 2                      | 4                    |
| EF554871.1.1486    | <i>Pseudomonas</i> sp. AB42 16S ribosomal RNA gene, partial sequence                   | Adaptive Potential of Alkaliphilic Bacteria towards Chloroaromatic Substrates Assessed by a GFP-Tagged 2,4-D Degradation Plasmid                                                                                           | Lake                   | 443000;443001;443002;1740285 | gi146747229 gb EF554868.1         | 100                    | 0       | 9                      | 46                   |
| EU101096.1.1498    | Uncultured bacterium clone FS0612_B12 16S ribosomal RNA gene, partial sequence         | Niche differentiation among sulfur-oxidizing bacterial populations in cave waters                                                                                                                                          | Subsurface             | 77133                        | gi156573149 gb EU101096.1         | 100                    | 0       | 5                      | 12                   |

Supplementary Table 4 – BLAST hits table for representative sequences associated to OTUs affiliated to genus *Pseudomonas*.

|                 |                                                                                               |                                                                                                                                                                                     |                   |        |                            |     |   |    |     |
|-----------------|-----------------------------------------------------------------------------------------------|-------------------------------------------------------------------------------------------------------------------------------------------------------------------------------------|-------------------|--------|----------------------------|-----|---|----|-----|
| EU305582.1.1496 | Uncultured <i>Pseudomonas</i> sp. clone 3-A 16S ribosomal RNA gene, partial sequence          | Nitrite removal performance and community structure of nitrite-oxidizing and heterotrophic bacteria suffered with organic Matter                                                    | Microcosm         | 114707 | gi163676410 gb EU305582.1  | 100 | 0 | 22 | 453 |
| EU375162.1.1248 | Uncultured <i>Pseudomonas</i> sp. clone Sc13 16S ribosomal RNA gene, partial sequence         | Bacterial communities from shoreline environments (costa da morte, northwestern Spain) affected by the prestige oil spill                                                           | Coastal water     | 114707 | gi166407785 gb EU375162.1  | 100 | 0 | 2  | 17  |
| EU531805.1.1258 | <i>Pseudomonas pseudoalcaligenes</i> 16S ribosomal RNA gene, partial sequence                 | Bacterial strains isolated from harvested tiger shrimp ( <i>Peneaus Monodon</i> )                                                                                                   | Host-associated   | 330    | gi170962995 gb EU531805.1  | 100 | 0 | 7  | 12  |
| EU536649.1.1395 | Uncultured bacterium clone nbf64e03 16S ribosomal RNA gene, partial sequence                  | A diversity profile of the human skin microbiota                                                                                                                                    | Host-associated   | 77133  | gi187964754 gb EU536649.1  | 100 | 0 | 5  | 503 |
| FJ005061.1.1494 | <i>Pseudomonas</i> sp. enrichment culture clone Guo7 16S ribosomal RNA gene, partial sequence | The bioleaching feasibility for Pb/Zn smelting slag and community characteristics of indigenous moderate-thermophilic bacteria                                                      | Subsurface        | 557865 | gi204342383 gb FJ005061.1  | 100 | 0 | 7  | 17  |
| FJ170038.1.1503 | <i>Pseudomonas</i> sp. CF14-10 16S ribosomal RNA gene, partial sequence                       | sediments of the South China Sea                                                                                                                                                    | Subsurface        | 562724 | gi206585088 gb FJ170038.1  | 100 | 0 | 9  | 568 |
| FJ192249.1.1454 | Uncultured <i>Pseudomonas</i> sp. clone GI3-S-5-G03 16S ribosomal RNA gene, partial sequence  | Comprehensive census of bacteria in clean rooms by using DNA microarray and cloning methods                                                                                         | Urban             | 114707 | gi209421869 gb FJ192249.1  | 100 | 0 | 26 | 712 |
| FJ557456.1.1399 | Uncultured bacterium clone ET_H_1d10 16S ribosomal RNA gene, partial sequence                 | Endotracheal tube biofilm inoculation of oral flora and subsequent colonization of opportunistic pathogens                                                                          | Host-associated   | 77133  | gi224569195 gb FJ557456.1  | 100 | 0 | 6  | 11  |
| FJ674339.1.1393 | Uncultured bacterium clone LL141-1D15 16S ribosomal RNA gene, partial sequence                | Synecology of the primary and secondary feedlot habitats of <i>Escherichia coli</i> O157:H7                                                                                         | Biological sample | 77133  | gi223678636 gb FJ674339.1  | 100 | 0 | 7  | 10  |
| FJ900861.1.1397 | Uncultured bacterium clone C-44 16S ribosomal RNA gene, partial sequence                      | Comparison of microbial community compositions of injection and production well samples in a long-term water-flooded petroleum Reservoir                                            | Subsurface        | 77133  | gi229428754 gb FJ900861.1  | 100 | 0 | 7  | 9   |
| FJ900872.1.1397 | Uncultured bacterium clone C-55 16S ribosomal RNA gene, partial sequence                      | Comparison of microbial community compositions of injection and production well samples in a long-term water-flooded petroleum Reservoir                                            | Subsurface        | 77133  | gi229428765 gb FJ900872.1  | 100 | 0 | 9  | 14  |
| FJ900880.1.1395 | Uncultured bacterium clone C-62 16S ribosomal RNA gene, partial sequence                      | Comparison of microbial community compositions of injection and production well samples in a long-term water-flooded petroleum Reservoir                                            | Subsurface        | 77133  | gi229428773 gb FJ900880.1  | 100 | 0 | 21 | 326 |
| FN652910.1.1237 | <i>Pseudomonas putida</i> partial 16S rRNA gene, isolate P5                                   | Isolation, characterization and screening for antimicrobial activities of <i>Padina pavonica</i> associated bacteria                                                                | Host-associated   | 303    | gi290490824 emb FN652910.1 | 100 | 0 | 3  | 45  |
| FN813480.1.1499 | <i>Pseudomonas stutzeri</i> partial 16S rRNA gene, isolate Gr20                               | The genetic diversity of culturable nitrogen-fixing bacteria in the rhizosphere of wheat                                                                                            | Subsurface        | 316    | gi295810396 emb FN813480.1 | 100 | 0 | 17 | 30  |
| GQ033288.1.1360 | Uncultured bacterium clone nbw1028h09c1 16S ribosomal RNA gene, partial sequence              | Topographical and temporal diversity of the human skin microbiome                                                                                                                   | Host-associated   | 77133  | gi238303670 gb GQ033288.1  | 100 | 0 | 4  | 10  |
| GQ258636.1.1493 | <i>Pseudomonas</i> sp. SR3(2009) 16S ribosomal RNA gene, partial sequence                     | Direct Submission, strain SR3                                                                                                                                                       | Lab strain        | 659426 | gi256352433 gb GQ258636.1  | 100 | 0 | 5  | 933 |
| GQ358933.1.1498 | <i>Pseudomonas</i> sp. BSw21506 16S ribosomal RNA gene, partial sequence                      | Direct Submission, strain BSw21506                                                                                                                                                  | Lab strain        | 664427 | gi255689465 gb GQ358933.1  | 100 | 0 | 12 | 19  |
| GQ388993.1.1508 | Uncultured bacterium clone J41 16S ribosomal RNA gene, partial sequence                       | Characterization of Bacterial Community Structure in a Drinking Water Distribution System during an Occurrence of Red Water                                                         | Subsurface        | 77133  | gi256593919 gb GQ388993.1  | 100 | 0 | 5  | 11  |
| GQ389202.1.1509 | Uncultured bacterium clone D75 16S ribosomal RNA gene, partial sequence                       | Characterization of Bacterial Community Structure in a Drinking Water Distribution System during an Occurrence of Red Water                                                         | Subsurface        | 77133  | gi256594128 gb GQ389202.1  | 100 | 0 | 8  | 16  |
| GQ415381.1.1510 | uncultured bacterium clone DQB-P183 genomic sequence                                          | Microbial diversity in different production waters of Daqing Oilfield                                                                                                               | Subsurface        | 77133  | gi308097127 gb GQ415381.1  | 100 | 0 | 10 | 21  |
| GQ979956.1.1504 | Uncultured bacterium clone SRC_NRB027 16S ribosomal RNA gene, partial sequence                | Direct Submission, clone SRC_NRB027                                                                                                                                                 | Lab strain        | 77133  | gi261499583 gb GQ979956.1  | 100 | 0 | 15 | 283 |
| GU136489.1.1369 | <i>Pseudomonas</i> sp. DY1 16S ribosomal RNA gene, partial sequence                           | Direct Submission, strain DY1                                                                                                                                                       | Lab strain        | 690347 | gi265263160 gb GU136489.1  | 100 | 0 | 7  | 13  |
| GU179609.1.1317 | Uncultured <i>Pseudomonas</i> sp. clone D006011A15 16S ribosomal RNA gene, partial sequence   | Microbial diversity profiles of fluids from low-temperature petroleum reservoirs with and without exogenous water perturbation                                                      | Subsurface        | 114707 | gi306491368 gb GU179609.1  | 100 | 0 | 2  | 159 |
| GU179630.1.1499 | Uncultured <i>Pseudomonas</i> sp. clone D118231H09 16S ribosomal RNA gene, partial sequence   | Microbial diversity profiles of fluids from low-temperature petroleum reservoirs with and without exogenous water perturbation                                                      | Subsurface        | 114707 | gi306491389 gb GU179630.1  | 100 | 0 | 9  | 17  |
| GU272270.1.1504 | <i>Pseudomonas amygdali</i> pv. <i>lachrymans</i> str. M301315 chromosome, complete genome    | Dynamic evolution of pathogenicity revealed by sequencing and comparative genomics of 19 <i>Pseudomonas syringae</i> isolates                                                       | Subsurface        | 77133  | gi284025723 gb GU272270.1  | 100 | 0 | 3  | 648 |
| GU384267.1.1319 | <i>Pseudomonas aeruginosa</i> strain SZH16 16S ribosomal RNA gene, partial sequence           | In situ degradation of phenol and promotion of plant growth in contaminated environments by a single <i>Pseudomonas aeruginosa</i> strain                                           | Subsurface        | 287    | gi288189621 gb GU384267.1  | 100 | 0 | 4  | 13  |
| GU390196.1.1300 | Uncultured bacterium clone SLE33F 16S ribosomal RNA gene, partial sequence                    | Shifts in microbial community structure of granular and liquid biomass in response to changes to infeed and digester design in anaerobic digesters receiving food-processing wastes | Subsurface        | 77133  | gi312178659 gb GU390196.1  | 100 | 0 | 14 | 70  |

Supplementary Table 4 – BLAST hits table for representative sequences associated to OTUs affiliated to genus *Pseudomonas*.

|                  |                                                                                            |                                                                                                                                                                      |                 |         |                             |       |   |    |      |
|------------------|--------------------------------------------------------------------------------------------|----------------------------------------------------------------------------------------------------------------------------------------------------------------------|-----------------|---------|-----------------------------|-------|---|----|------|
| HE576400.1.1451  | uncultured bacterium partial 16S rRNA gene, clone K16.133 AW                               | A combined cultivation and cultivation-independent approach shows high bacterial diversity in water-miscible metalworking fluids                                     | Urban           | 77133   | gi 377549755 emb HE576400.1 | 100   | 0 | 4  | 10   |
| HM066682.1.1514  | Uncultured bacterium clone EDW07B006_73 16S ribosomal RNA gene, partial sequence           | Microbial diversity and impact on carbonate geochemistry across a changing geochemical gradient in a karst aquifer                                                   | Subsurface      | 77133   | gi 313770588 gb HM066682.1  | 100   | 0 | 8  | 16   |
| HM128723.1.1454  | Uncultured bacterium clone SINN704 16S ribosomal RNA gene, partial sequence                | Diversity of bacterioplankton in contrasting Tibetan lakes revealed by high-density microarray and clone library analysis                                            | Lake            | 77133   | gi 295879789 gb HM128723.1  | 100   | 0 | 20 | 184  |
| HM142822.1.1501  | Proteobacterium WJQ No.5 16S ribosomal RNA gene, partial sequence                          | Direct Submission, strain WJQ No. 5                                                                                                                                  | Lab strain      | 797062  | gi 298256144 gb HM142822.1  | 100   | 0 | 34 | 2472 |
| HM317009.1.1358  | Uncultured bacterium clone ncd315a03e1 16S ribosomal RNA gene, partial sequence            | Temporal shifts in the skin microbiome associated with disease flares and treatment in children with atopic dermatitis                                               | Host-associated | 77133   | gi 297010604 gb HM317009.1  | 100   | 0 | 4  | 12   |
| HM445212.1.1363  | Uncultured bacterium clone BL1289fO5 16S ribosomal RNA gene, partial sequence              | Comparison of Bacterial Diversity in Azorean and Hawaiian Lava Cave Microbial Mats                                                                                   | Subsurface      | 77133   | gi 302398051 gb HM445212.1  | 100   | 0 | 7  | 32   |
| HQ011396.1.1501  | <i>Pseudomonas stutzeri</i> strain NCTC10475 genome assembly, chromosome: 1                | NCTC10475                                                                                                                                                            | Lab strain      | 77133   | gi 307776705 gb HQ011396.1  | 100   | 0 | 8  | 139  |
| HQ224612.1.1430  | <i>Pseudomonas</i> sp. SGb387 16S ribosomal RNA gene, partial sequence                     | Phylogenetic relationships of bacterial endophytes from <i>Taxus Globosa</i>                                                                                         | Host-associated | 1248114 | gi 411172546 gb JX897952.1  | 99.15 | 0 | 15 | 73   |
| HQ246001.90.1551 | UNVERIFIED: Uncultured <i>Pseudomonas</i> sp. 16S ribosomal RNA-like sequence              | Proteobacteria dominance in the estuarine belt of river Narmada, India as depicted by molecular phylogenetic approaches                                              | Freshwater      | 471     | gi 226430883 gb FJ816052.1  | 88.52 | 0 | 4  | 19   |
| HQ323436.1.1502  | <i>Pseudomonas stutzeri</i> strain M4 16S ribosomal RNA gene, partial sequence             | Diversity of airborne bacteria community in the Mogao Grottoes, Dunhuang, China                                                                                      | Air             | 316     | gi 319658795 gb HQ323436.1  | 100   | 0 | 6  | 10   |
| HQ395163.1.1497  | Uncultured bacterium clone OTU651 16S ribosomal RNA gene, partial sequence                 | Culture-independent and culture-dependent methods reveal diverse bacterial and archaeal communities in a biodegraded Malaysian oil Reservoir                         | Subsurface      | 77133   | gi 320172034 gb HQ395163.1  | 100   | 0 | 4  | 18   |
| HQ438076.1.1492  | <i>Pseudomonas</i> sp. TeU 16S ribosomal RNA gene, partial sequence                        | Isolation and characterization of an environmental cadmium- and tellurite-resistant <i>Pseudomonas</i> strain                                                        | Subsurface      | 944290  | gi 318063761 gb HQ438076.1  | 100   | 0 | 8  | 11   |
| HQ848110.1.1406  | <i>Pseudomonas argentinensis</i> strain PL-40-1 16S ribosomal RNA gene, partial sequence   | Phylogenetic diversity of culturable bacteria isolated from the disused ancient Kiyik River                                                                          | Freshwater      | 289370  | gi 340025389 gb HQ848110.1  | 100   | 0 | 25 | 378  |
| JF430817.1.1403  | <i>Pseudomonas</i> sp. P56(2011) 16S ribosomal RNA gene, partial sequence                  | Genetic and functional diversity of fluorescent <i>Pseudomonas</i> from rhizospheric soils of wheat crop                                                             | Subsurface      | 1079824 | gi 345132366 gb JF430817.1  | 100   | 0 | 14 | 76   |
| JF500179.1.1495  | Uncultured bacterium clone 1572_50bact 16S ribosomal RNA gene, partial sequence            | The deep biosphere in terrestrial sediments in the Chesapeake Bay area, Virginia, USA                                                                                | Subsurface      | 77133   | gi 343170179 gb JF500179.1  | 100   | 0 | 11 | 230  |
| JF500197.1.1495  | Uncultured bacterium clone 1563_48bact 16S ribosomal RNA gene, partial sequence            | The deep biosphere in terrestrial sediments in the Chesapeake Bay area, Virginia, USA                                                                                | Subsurface      | 77133   | gi 343170197 gb JF500197.1  | 100   | 0 | 10 | 18   |
| JF741936.1.1498  | Uncultured bacterium clone LHJB-8 16S ribosomal RNA gene, partial sequence                 | Microbial communities in oil reservoirs with different salinities                                                                                                    | Subsurface      | 77133   | gi 332712701 gb JF741936.1  | 100   | 0 | 3  | 10   |
| JF820098.1.1429  | <i>Pseudomonas</i> sp. PG-3-1 16S ribosomal RNA gene, partial sequence                     | Diversity of Culturable Butane-oxidizing Bacteria in Oil and Gas Field Soil                                                                                          | Subsurface      | 1036156 | gi 334690415 gb JF820098.1  | 100   | 0 | 8  | 11   |
| JN609543.1.1229  | <i>Pseudomonas fluorescens</i> strain Cantas14 16S ribosomal RNA gene, partial sequence    | The culturable intestinal microbiota of triploid and diploid juvenile Atlantic salmon ( <i>Salmo salar</i> ) - a comparison of composition and drug resistance       | Host-associated | 294     | gi 358440878 gb JN609543.1  | 100   | 0 | 5  | 38   |
| JQ236848.1.1432  | <i>Pseudomonas stutzeri</i> strain hswx82 16S ribosomal RNA gene, partial sequence         | Direct Submission, strain hswx82                                                                                                                                     | Lab strain      | 316     | gi 377830169 gb JQ236848.1  | 100   | 0 | 41 | 5419 |
| JQ425963.1.1492  | Uncultured bacterium clone CT0C1CA03 16S ribosomal RNA gene, partial sequence              | Bacterial diversity in an alkaline saline soil spiked with Anthracene                                                                                                | Lake            | 77133   | gi 385760667 gb JQ425963.1  | 100   | 0 | 9  | 22   |
| JQ684327.1.1500  | Uncultured bacterium clone HWGB-69 16S ribosomal RNA gene, partial sequence                | Bacterial and archaeal diversity in permafrost soil from Kunlun Mountains Pass, Tibet Plateau of China                                                               | Subsurface      | 77133   | gi 387568220 gb JQ684327.1  | 100   | 0 | 3  | 12   |
| JQ723717.1.1405  | <i>Pseudomonas</i> sp. B-5-1 16S ribosomal RNA gene, partial sequence                      | beach sand in the west sea, Korea                                                                                                                                    | Coastal water   | 1172620 | gi 384392471 gb JQ723717.1  | 100   | 0 | 13 | 68   |
| JQ894900.1.1514  | Uncultured bacterium clone YPMB-G12 16S ribosomal RNA gene, partial sequence               | Microbial diversity of endosymbiont bacteria in the spiraling Whitefly                                                                                               | Host-associated | 77133   | gi 411181008 gb JQ894900.1  | 100   | 0 | 9  | 21   |
| JQ900532.1.1441  | <i>Pseudomonas mendocina</i> strain B8 16S ribosomal RNA gene, partial sequence            | Crude oil degrading bacterial isolates from ecological region of Assam                                                                                               | Subsurface      | 300     | gi 402244732 gb JQ900532.1  | 100   | 0 | 2  | 126  |
| JX222557.1.1395  | Uncultured bacterium clone EMIRGE_OTU_s2b2b_12537 16S ribosomal RNA gene, partial sequence | Subsurface microbial community response to acetate amendment                                                                                                         | Subsurface      | 77133   | gi 395559126 gb JX222557.1  | 100   | 0 | 1  | 12   |
| JX222807.1.1498  | Uncultured bacterium clone EMIRGE_OTU_s3t2d_3949 16S ribosomal RNA gene, partial sequence  | Subsurface microbial community response to acetate amendment                                                                                                         | Subsurface      | 77133   | gi 395559376 gb JX222807.1  | 100   | 0 | 4  | 9    |
| JX223934.1.1501  | Uncultured bacterium clone EMIRGE_OTU_s6b4a_3133 16S ribosomal RNA gene, partial sequence  | Subsurface microbial community response to acetate amendment                                                                                                         | Subsurface      | 77133   | gi 395560503 gb JX223934.1  | 100   | 0 | 5  | 10   |
| JX266364.1.1449  | <i>Pseudomonas</i> sp. B2085 16S ribosomal RNA gene, partial sequence                      | Depth-Related Changes in Community Structure of Culturable Mineral Weathering Bacteria and in Weathering Patterns Caused by Them along Two Contrasting Soil Profiles | Subsurface      | 1225045 | gi 402549839 gb JX266364.1  | 100   | 0 | 31 | 558  |

Supplementary Table 4 – BLAST hits table for representative sequences associated to OTUs affiliated to genus *Pseudomonas*.

|                 |                                                                                                       |                                                                                                                                                                                 |                 |              |                             |     |   |    |     |
|-----------------|-------------------------------------------------------------------------------------------------------|---------------------------------------------------------------------------------------------------------------------------------------------------------------------------------|-----------------|--------------|-----------------------------|-----|---|----|-----|
| JX945764.1.1431 | <i>Pseudomonas</i> sp. LARP66 16S ribosomal RNA gene, partial sequence                                | Microbial diversity of Ethiopian soda lakes assessed by cultivation Methods                                                                                                     | Lake            | 1266816      | gi 428274238 gb JX945764.1  | 100 | 0 | 8  | 11  |
| KC119131.1.1470 | <i>Pseudomonas</i> sp. RCC12 16S ribosomal RNA gene, partial sequence                                 | Isolation of CO2 fixing bacteria from dehradun caves                                                                                                                            | Subsurface      | 1268824      | gi 429841843 gb KC119131.1  | 100 | 0 | 2  | 9   |
| KC166766.1.1460 | Uncultured <i>Pseudomonas</i> sp. clone BC061 16S ribosomal RNA gene, partial sequence                | Bacterial community and groundwater quality changes in an anaerobic aquifer during groundwater recharge with aerobic recycled water                                             | Subsurface      | 114707       | gi 523453881 gb KC166766.1  | 100 | 0 | 5  | 15  |
| KC469080.1.1418 | <i>Pseudomonas</i> sp. EM174 16S ribosomal RNA gene, partial sequence                                 | Direct Submission, isolate EM174                                                                                                                                                | Lab strain      | 1282313      | gi 452108584 gb KC469080.1  | 100 | 0 | 6  | 19  |
| KC758944.1.1396 | Uncultured bacterium clone 12ALLV2e09 16S ribosomal RNA gene, partial sequence                        | Using DNA-stable isotope probing to identify microorganisms involved in <i>mbc</i> and <i>tba</i> biodegradation                                                                | Coastal water   | 77133        | gi 478444906 gb KC758944.1  | 100 | 0 | 2  | 22  |
| KC852955.1.1440 | <i>Pseudomonas</i> <i>cuatrocienegasensis</i> strain LEH6_4A 16S ribosomal RNA gene, partial sequence | Midgut Microbial Community of <i>Culex quinquefasciatus</i> Mosquito Populations from India                                                                                     | Host-associated | 77133        | gi 523453428 gb KC852955.1  | 100 | 0 | 25 | 293 |
| KF021824.1.1426 | <i>Pseudomonas</i> sp. H-144 16S ribosomal RNA gene, partial sequence                                 | Cultured diversity of marine bacteria                                                                                                                                           | Seawater        | 1345863      | gi 513045820 gb KF021824.1  | 100 | 0 | 2  | 9   |
| KF494749.1.1502 | Uncultured bacterium clone B24-205 16S ribosomal RNA gene, partial sequence                           | Vertical changes of the structure of bacterial communities through a permafrost core profile from Qinghai-Tibet Plateau                                                         | Subsurface      | 77133        | gi 532529728 gb KF494749.1  | 100 | 0 | 2  | 8   |
| KF494759.1.1501 | Uncultured bacterium clone B9-456 16S ribosomal RNA gene, partial sequence                            | Vertical changes of the structure of bacterial communities through a permafrost core profile from Qinghai-Tibet Plateau                                                         | Subsurface      | 77133        | gi 532529738 gb KF494759.1  | 100 | 0 | 5  | 11  |
| KF657327.1.1480 | <i>Pseudomonas mendocina</i> strain 2E 16S ribosomal RNA gene, partial sequence                       | Alkalo Tolerant Bacteria, water                                                                                                                                                 | Lake            | 300          | gi 545599206 gb KF657327.1  | 100 | 0 | 6  | 10  |
| KF722300.1.1267 | Uncultured <i>Pseudomonas</i> sp. clone DVBSW_J342 16S ribosomal RNA gene, partial sequence           | Response of bacterial community structure to seasonal fluctuation and anthropogenic pollution on coastal water of A Lang-Sostiya ship breaking yard, Bhavnagar, India           | Coastal water   | 114707       | gi 643039831 gb KF722300.1  | 100 | 0 | 5  | 9   |
| KF836136.1.1422 | <i>Pseudomonas plecoglossicida</i> strain SBADK2 16S ribosomal RNA gene, partial sequence             | rhizosphere bacteria for agricultural and environmental use                                                                                                                     | Subsurface      | 70775        | gi 578003379 gb KF836136.1  | 100 | 0 | 15 | 46  |
| KF851140.1.1502 | Uncultured <i>Pseudomonas</i> sp. clone BJP8S20-c24 16S ribosomal RNA gene, partial sequence          | Lithology-Controlled Bacteria Community in an Ammonium-Rich Aquifer-Aquitard System in the Pearl River Delta, China                                                             | Subsurface      | 114707       | gi 582054428 gb KF851140.1  | 100 | 0 | 10 | 30  |
| KF923425.1.1502 | <i>Pseudomonas xanthomarina</i> strain 15 16S ribosomal RNA gene, partial sequence                    | Culturable bacteria from the Qinghai-Tibet Plateau                                                                                                                              | Soil            | 271420       | gi 594591039 gb KF923425.1  | 100 | 0 | 8  | 10  |
| KJ210658.1.1345 | <i>Pseudomonas xinjiangensis</i> strain WL-257 16S ribosomal RNA gene, partial sequence               | Phylogenetic diversity of eudophytic bacteria from <i>Populus euphratica</i> in 20-year <i>Populus jujube</i> forest ecotone of Chakhikh county of Xinjiang                     | Subsurface      | 487184       | gi 612340510 gb KJ210658.1  | 100 | 0 | 8  | 25  |
| KJ424421.1.1503 | <i>Pseudomonas</i> sp. GW28-5 16S ribosomal RNA gene, partial sequence                                | cytotoxic bacteria from Antarctica                                                                                                                                              | Host-associated | 77133        | gi 601035987 gb KJ424421.1  | 100 | 0 | 4  | 121 |
| KJ475025.1.1452 | <i>Pseudomonas peli</i> strain IARI-RP26 16S ribosomal RNA gene, partial sequence                     | Prospecting cold deserts of north western Himalayas for microbial diversity and plant growth promoting attributes                                                               | Soil            | 53406;592361 | gi 387285851 gb JQ795777.1  | 100 | 0 | 27 | 962 |
| KJ600877.1.1458 | Uncultured bacterium clone 83A 16S ribosomal RNA gene, partial sequence                               | Manipulating the banana rhizosphere microbiome for biological control of Panama disease                                                                                         | Subsurface      | 77133        | gi 646117505 gb KJ600877.1  | 100 | 0 | 9  | 24  |
| KJ806232.1.1411 | <i>Pseudomonas alcaligenes</i> strain PBR-49 16S ribosomal RNA gene, partial sequence                 | Phylogenetic characterization of heterotrophic bacteria isolated from photobioreactor (PBR) cultures of <i>Synechocystis</i> sp. PCC6803                                        | Host-associated | 43263        | gi 669340641 gb KJ806232.1  | 100 | 0 | 10 | 26  |
| KJ806252.1.1456 | <i>Pseudomonas stutzeri</i> strain PBR-57 16S ribosomal RNA gene, partial sequence                    | Phylogenetic characterization of heterotrophic bacteria isolated from photobioreactor (PBR) cultures of <i>Synechocystis</i> sp. PCC6803                                        | Host-associated | 316          | gi 669340661 gb KJ806252.1  | 100 | 0 | 7  | 10  |
| KJ809251.1.1512 | Uncultured bacterium clone F33GN 16S ribosomal RNA gene, partial sequence                             | Bacteria associated with arbuscular mycorrhizal fungi within roots of plants growing in a soil highly contaminated with aliphatic and aromatic petroleum hydrocarbons           | Subsurface      | 77133        | gi 67177739 gb KJ809251.1   | 100 | 0 | 2  | 40  |
| KJ862118.1.1417 | Uncultured <i>Pseudomonas</i> sp. clone 35 16S ribosomal RNA gene, partial sequence                   | 16S rDNA gene clone libraries which isolated from biodesulfurization bioreactor                                                                                                 | Microcosm       | 114707       | gi 672443372 gb KJ862118.1  | 100 | 0 | 8  | 79  |
| KP704423.1.1437 | <i>Pseudomonas</i> sp. UFYA113 16S ribosomal RNA gene, partial sequence                               | Identification and characterization of the part of the bacterial community associated with field-grown tall fescue ( <i>Festuca arundinacea</i> ) cv. SFRO Don Tom s in Uruguay | Subsurface      | 1605337      | gi 756058359 gb KP704423.1  | 100 | 0 | 7  | 11  |
| LN560920.1.1377 | Uncultured bacterium partial 16S rRNA gene, clone SIGC587_N11D1_16S_B                                 | Leaf-cutter ant refuse dumps are nutrient reservoirs harboring diverse microbial assemblages                                                                                    | Microcosm       | 77133        | gi 697256444 emb LN563985.1 | 100 | 0 | 15 | 200 |
| LN563984.1.1372 | Uncultured bacterium partial 16S rRNA gene, clone SIBS643_N12D0_16S_B                                 | Leaf-cutter ant refuse dumps are nutrient reservoirs harboring diverse microbial assemblages                                                                                    | Microcosm       | 77133        | gi 697256444 emb LN563985.1 | 100 | 0 | 6  | 16  |
| LN565700.1.1370 | Uncultured bacterium partial 16S rRNA gene, clone SIBG551_N12D2_16S_B                                 | Leaf-cutter ant refuse dumps are nutrient reservoirs harboring diverse microbial assemblages                                                                                    | Microcosm       | 77133        | gi 697264995 emb LN565700.1 | 100 | 0 | 7  | 123 |



## References

1. **McMurdie PJ, Holmes S.** Phyloseq: An R Package for Reproducible Interactive Analysis and Graphics of Microbiome Census Data. *PLoS ONE* 2013;8:e61217.
2. **Kumar S, Stecher G, Tamura K.** MEGA7: Molecular Evolutionary Genetics Analysis Version 7.0 for Bigger Datasets. *Molecular Biology and Evolution* 2016;33:1870–1874.
3. **Edgar RC.** MUSCLE: multiple sequence alignment with high accuracy and high throughput. *Nucleic acids research* 2004;32:1792–7.
4. **Saitou N, Nei M.** The neighbor-joining method: a new method for reconstructing phylogenetic trees. *Molecular Biology and Evolution* 1987;4:406–25.
5. **Tamura K, Nei M, Kumar S.** Prospects for inferring very large phylogenies by using the neighbor-joining method. *Proceedings of the National Academy of Sciences* 2004;101:11030–11035.
6. **Barnhart EP, Weeks EP, Jones EJP, Ritter DJ, McIntosh JC, et al.** Hydrogeochemistry and coal-associated bacterial populations from a methanogenic coal bed. *International Journal of Coal Geology* 2016;162:14–26.
7. **Foght J, Aislabie J, Turner S, Brown CE, Ryburn J, et al.** Culturable Bacteria in Subglacial Sediments and Ice from Two Southern Hemisphere Glaciers. *Microbial Ecology* 2004;47:329–40.
8. **Leuko S, Goh F, Ibáñez-Peral R, Burns BP, Walter MR, et al.** Lysis efficiency of standard DNA extraction methods for *Halococcus* spp. in an organic rich environment. *Extremophiles* 2008;12:301–308.
